# Supplementary material for: Double Helix of Icosahedra Structure and Spin Glass Magnetism of the δ-Co2.5Zn17.5–xMnx (x = 0.4–3.5) Pseudo-Binary Alloys
Source: PubMed Central journal article supplement (PMC11151197; doi:10.1021/acs.inorgchem.4c00686), 2024-05-20
Supplement: ic4c00686_si_001.pdf [file ic4c00686_si_001.pdf]

## Supporting Information

### Double-helix of icosahedra structure and spin-glass magnetism of the

### $\delta$ -Co<sub>2.5</sub>Zn<sub>17.5-x</sub>Mn<sub>x</sub> (x = 0.4–3.5) pseudo-binary alloys

Amit Mondal,<sup>1</sup> Riju Dey,<sup>1</sup> Andreja Jelen,<sup>2</sup> Primož Koželj,<sup>2,3</sup> Sandip Kumar Kuila,<sup>1</sup>  
Rahul Pan,<sup>1</sup> Stanislav Vrtnik,<sup>2</sup> Jože Luzar,<sup>2</sup> Magdalena Wencka,<sup>2,4</sup> Julia Petrović,<sup>2</sup>  
Peter Mihor,<sup>2</sup> Zvonko Jagličić,<sup>5</sup> Anton Meden,<sup>6</sup> Partha Pratim Jana,<sup>1</sup> Janez Dolinšek<sup>2,3</sup>

<sup>1</sup> *Department of Chemistry, Indian Institute of Technology, Kharagpur-721302, India*

<sup>2</sup> *J. Stefan Institute, Jamova 39, SI-1000 Ljubljana, Slovenia*

<sup>3</sup> *University of Ljubljana, Faculty of Mathematics and Physics, Jadranska 19, SI-1000 Ljubljana, Slovenia*

<sup>4</sup> *Institute of Molecular Physics, Polish Academy of Sciences, Smoluchowskiego 17, PL-60-179 Poznań, Poland*

<sup>5</sup> *Institute of Mathematics, Physics and Mechanics & University of Ljubljana, Faculty of Civil and Geodetic Engineering, Jadranska 19, SI-1000 Ljubljana, Slovenia*

<sup>6</sup> *University of Ljubljana, Faculty of Chemistry and Chemical Technology, Večna pot 113, SI-1000 Ljubljana, Slovenia*

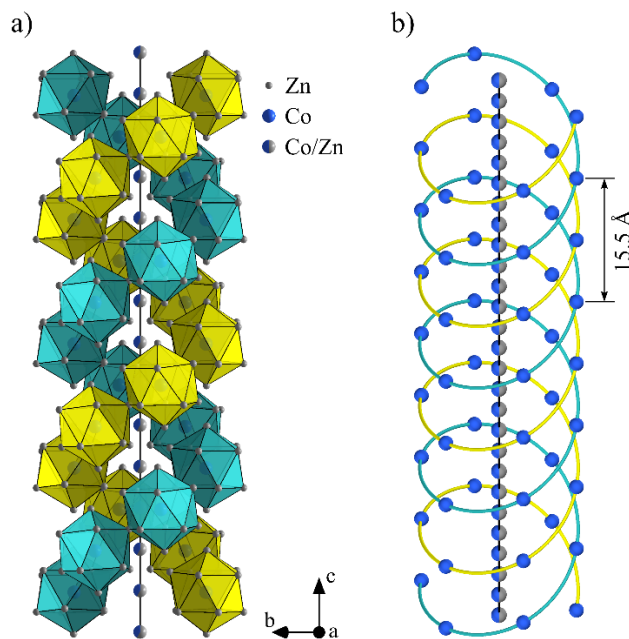

**Fig. S1:** (a) Crystal structure of the  $\delta\text{-Co}_{2.5}\text{Zn}_{17.5}$  binary intermetallic compound<sup>1</sup> (note that according to the PDF 04-017-0765 entry of the International Centre for Diffraction Data base, the  $\delta\text{-Co}_{2.5}\text{Zn}_{17.5}$  and  $\delta\text{-Co}_2\text{Zn}_{15}$  chemical formulae refer to the same compound). (b) The magnetic lattice of the  $\delta\text{-Co}_{2.5}\text{Zn}_{17.5}$  binary compound, consisting of the Co magnetic ions only. The Co atoms from the icosahedra centers (the Co11 6c site) form a regular double-helix structure (with all sites fully occupied), while the Co atoms on the 6-axis (the mixed Zn8/Co8 3a site with the Zn/Co occupancies 0.58/0.42) are statistically randomly substituted by the nonmagnetic Zn, approximately half-half, introducing randomness into the magnetic lattice.

(1) Boström, M.; Lidin, S. Preparation and double-helix icosahedra structure of  $\delta\text{-Co}_2\text{Zn}_{15}$ . *J. Solid State Chem.* **2002**, *166*, 53–57.

**Table S1.** The interatomic distances ( $< 3.0 \text{ \AA}$ ) for each atomic site of the  $\text{Co}_{2.5}\text{Zn}_{16.9}\text{Mn}_{0.6}$  (the c2 composition).

|     |         |    |             |
|-----|---------|----|-------------|
| Zn1 | Co11    | 2× | 2.4907(80)  |
|     | Zn2     | 2× | 2.5947(5)   |
|     | Zn6/Mn6 | 2× | 2.6506(132) |
|     | Zn4/Mn4 | 2× | 2.6621(76)  |
|     | Zn5     | 2× | 2.7147(132) |
|     | Zn3     | 2× | 2.7294(7)   |
| Zn2 | Co11    | 1× | 2.4801(82)  |
|     | Co11    | 1× | 2.5518(76)  |
|     | Zn1     | 1× | 2.5947(5)   |
|     | Zn9/Mn9 | 1× | 2.6496(9)   |
|     | Zn9/Mn9 | 1× | 2.6538(143) |
|     | Zn10    | 1× | 2.6542(142) |
|     | Zn10    | 1× | 2.6703(12)  |
|     | Zn7     | 1× | 2.6831(71)  |
|     | Zn4/Mn4 | 1× | 2.7008(78)  |
|     | Zn6/Mn6 | 1× | 2.8512(121) |
|     | Zn5     | 1× | 2.9439(124) |
| Zn3 | Co11    | 1× | 2.5696(78)  |
|     | Co11    | 1× | 2.6406(73)  |
|     | Zn6/Mn6 | 1× | 2.6639(20)  |
|     | Zn7     | 1× | 2.6760(71)  |
|     | Zn4/Mn4 | 1× | 2.6906(78)  |
|     | Zn5     | 1× | 2.7054(13)  |
|     | Zn1     | 1× | 2.7294(7)   |
|     | Zn3     | 2× | 2.7678(142) |
|     | Zn6/Mn6 | 1× | 2.8586(121) |

|         |         |    |             |
|---------|---------|----|-------------|
| Zn3     | Zn5     | 1× | 2.9483(124) |
| Zn4/Mn4 | Zn7     | 1× | 2.5783(150) |
|         | Co11    | 1× | 2.6322(152) |
|         | Zn1     | 1× | 2.6621(76)  |
|         | Zn10    | 1× | 2.6733(84)  |
|         | Zn5     | 1× | 2.6767(89)  |
|         | Zn6/Mn6 | 1× | 2.6851(87)  |
|         | Zn3     | 1× | 2.6906(78)  |
|         | Zn2     | 1× | 2.7008(78)  |
|         | Zn5     | 1× | 2.7914(56)  |
|         | Zn9/Mn9 | 1× | 2.8487(70)  |
|         | Zn5     | 1× | 2.9366(54)  |
|         | Zn10    | 1× | 2.9985(57)  |
| Zn5     | Co11    | 1× | 2.5902(64)  |
|         | Zn10    | 1× | 2.6727(11)  |
|         | Zn4/Mn4 | 1× | 2.6767(89)  |
|         | Zn3     | 1× | 2.7054(13)  |
|         | Zn5     | 1× | 2.7222(11)  |
|         | Zn7     | 1× | 2.7385(85)  |
|         | Zn7     | 1× | 2.7466(85)  |
|         | Zn4/Mn4 | 1× | 2.7914(56)  |
|         | Zn4/Mn4 | 1× | 2.9366(53)  |
|         | Zn2     | 1× | 2.9439(124) |
|         | Zn3     | 1× | 2.9483(124) |
| Zn6/Mn6 | Zn1     | 1× | 2.6506(132) |
|         | Co11    | 1× | 2.6515(58)  |
|         | Zn6/Mn6 | 1× | 2.6547(9)   |
|         | Zn3     | 1× | 2.6639(19)  |

|         |         |    |             |
|---------|---------|----|-------------|
|         | Zn9/Mn9 | 1× | 2.6668(16)  |
| Zn6/Mn6 | Zn4/Mn4 | 1× | 2.6851(87)  |
|         | Co11    | 1× | 2.7459(56)  |
|         | Zn7     | 1× | 2.7507(87)  |
|         | Zn7     | 1× | 2.7537(87)  |
|         | Zn2     | 1× | 2.8512(121) |
|         | Zn3     | 1× | 2.8586(121) |
|         | Zn7     | 1× | 2.8671(55)  |
| Zn7     | Co11    | 1× | 2.5764(152) |
|         | Zn4/Mn4 | 1× | 2.5783(150) |
|         | Zn3     | 1× | 2.6760(72)  |
|         | Zn9/Mn9 | 1× | 2.6827(76)  |
|         | Zn2     | 1× | 2.6831(71)  |
|         | Zn5     | 1× | 2.7385(85)  |
|         | Zn5     | 1× | 2.7466(84)  |
|         | Zn6/Mn6 | 1× | 2.7507(87)  |
|         | Zn6/Mn6 | 1× | 2.7537(87)  |
|         | Zn6/Mn6 | 1× | 2.8671(55)  |
| Zn8/Co8 | Zn10    | 2× | 2.5666(71)  |
|         | Zn8/Co8 | 2× | 2.5718(153) |
|         | Zn9/Mn9 | 2× | 2.6009(70)  |
|         | Zn10    | 2× | 2.6568(79)  |
|         | Zn9/Mn9 | 2× | 2.6918(79)  |
| Zn9/Mn9 | Zn8/Co8 | 1× | 2.6009(70)  |
|         | Zn10    | 1× | 2.6468(13)  |
|         | Zn2     | 1× | 2.6496(9)   |
|         | Zn2     | 1× | 2.6538(143) |
|         | Co11    | 1× | 2.6614(71)  |

|         |         |    |             |
|---------|---------|----|-------------|
|         | Zn6/Mn6 | 1× | 2.6668(17)  |
| Zn9/Co9 | Zn7     | 1× | 2.6827(76)  |
|         | Zn8/Co8 | 1× | 2.6918(79)  |
|         | Zn10    | 1× | 2.7881(151) |
|         | Zn4/Mn4 | 1× | 2.8487(70)  |
| Zn10    | Zn8/Co8 | 1× | 2.5666(71)  |
|         | Co11    | 1× | 2.6161(68)  |
|         | Zn9/Mn9 | 1× | 2.6468(13)  |
|         | Zn2     | 1× | 2.6542(142) |
|         | Zn8/Co8 | 1× | 2.6568(79)  |
|         | Zn2     | 1× | 2.6703(12)  |
|         | Zn5     | 1× | 2.6727(11)  |
|         | Zn4/Mn4 | 1× | 2.6733(84)  |
|         | Zn9/Mn9 | 1× | 2.7881(151) |
|         | Zn4/Mn4 | 1× | 2.9985(57)  |
| Co11    | Zn2     | 1× | 2.4801(81)  |
|         | Zn1     | 1× | 2.4907(80)  |
|         | Zn2     | 1× | 2.5518(76)  |
|         | Zn3     | 1× | 2.5696(78)  |
|         | Zn7     | 1× | 2.5764(152) |
|         | Zn5     | 1× | 2.5902(64)  |
|         | Zn10    | 1× | 2.6161(68)  |
|         | Zn4/Mn4 | 1× | 2.6322(152) |
|         | Zn3     | 1× | 2.6406(73)  |
|         | Zn6/Mn6 | 1× | 2.6515(58)  |
|         | Zn9/Mn9 | 1× | 2.6614(71)  |
|         | Zn6/Mn6 | 1× | 2.7459(57)  |
